# Supplementary material for: Geophysical evidence of massive hyperconcentrated push waves with embedded toma hills caused by the Flims rockslide, Switzerland
Source: Copernicus journal article supplement (doi:10.5194/esurf-10-1185-2022), 2022-11-21
Supplement: Supplementary file 1 [file esurf-10-1185-2022-supplement.pdf]

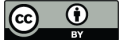

*Supplement of*

## **Geophysical evidence of massive hyperconcentrated push waves with embedded toma hills caused by the Flims rockslide, Switzerland**

**Sibylle Knapp et al.**

*Correspondence to:* Sibylle Knapp (sibylle.knapp@tum.de)

The copyright of individual parts of the supplement might differ from the article licence.

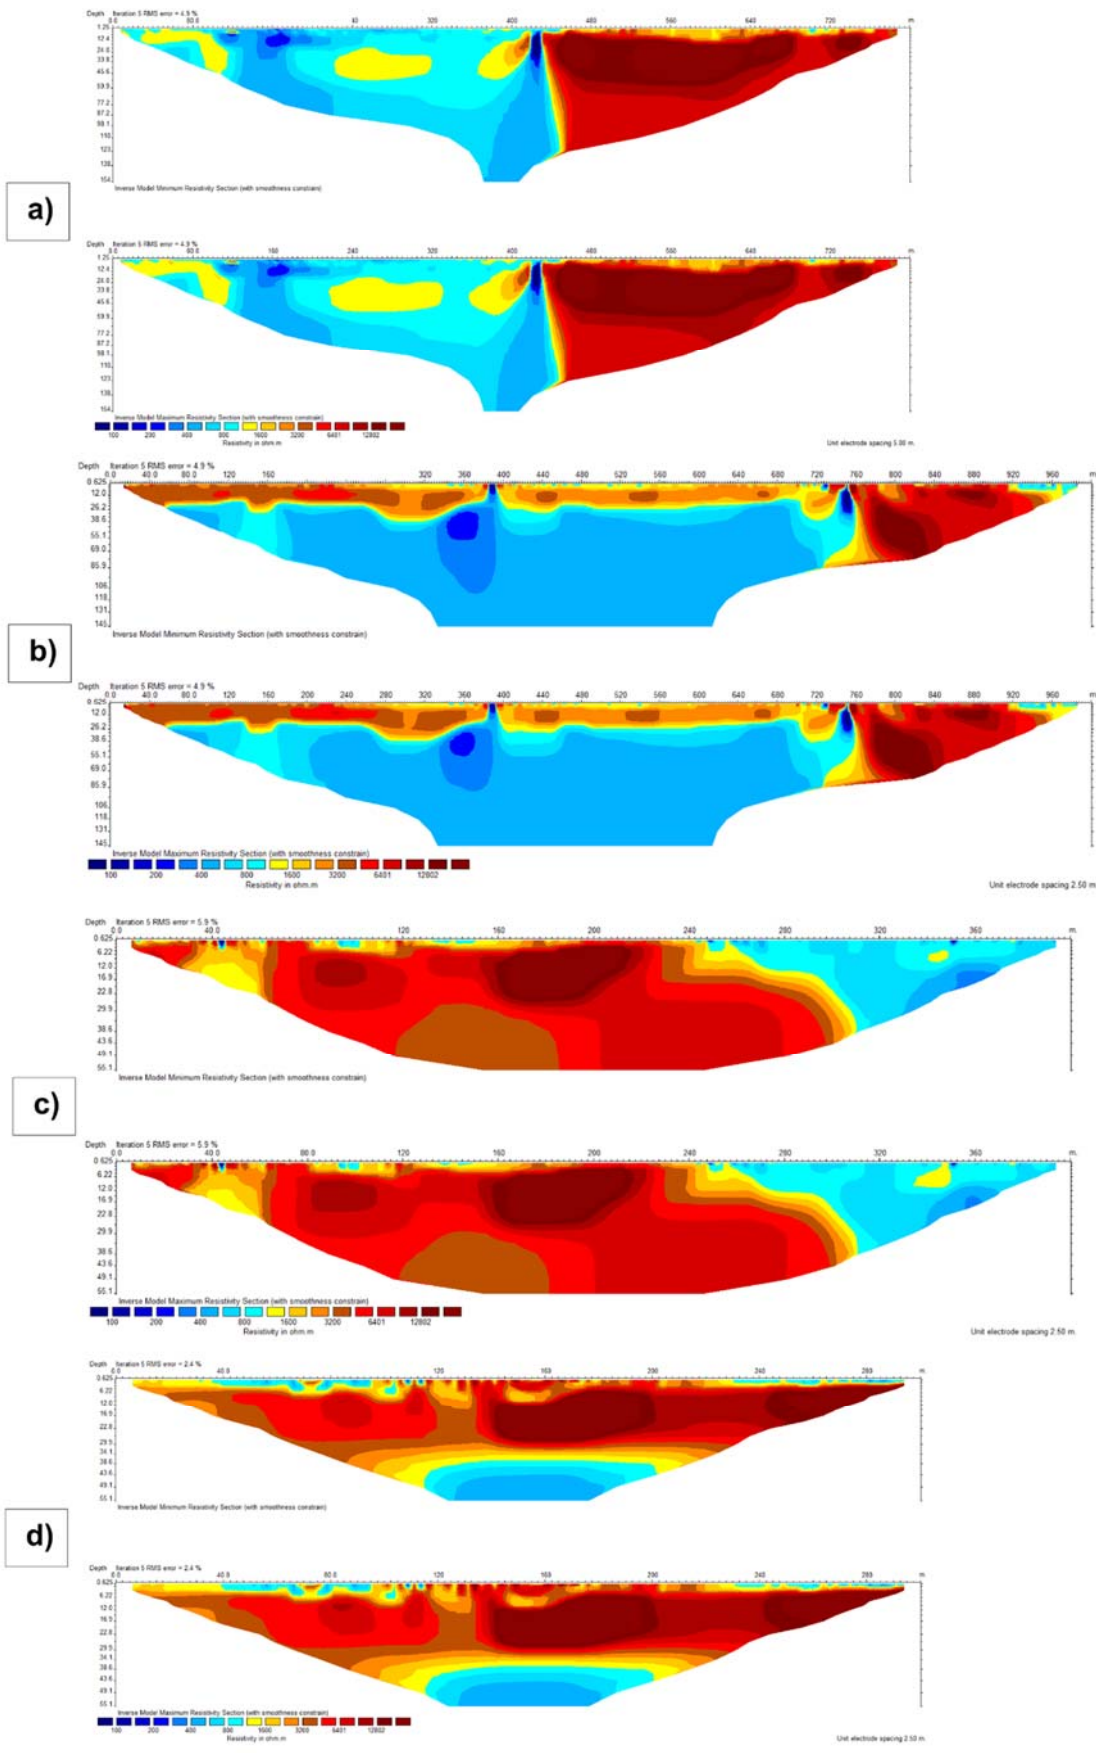

**Figure S1: MinMax-Plots of ERT-profiles P1-P4 (a-d) depicting each the modelled inversion with the minimum values (top) and maximum values (bottom) within the error range. Colour differences occur only sparsely and according to the error range at the specific location.**
